# Supplementary material for: RhWRKY33 Positively Regulates Onset of Floral Senescence by Responding to Wounding- and Ethylene-Signaling in Rose Plants
Source: Front Plant Sci. 2021 Nov 5;12:726797. doi: 10.3389/fpls.2021.726797 (PMC8602865; doi:10.3389/fpls.2021.726797)
Supplement: Supplementary Table 2 — Detailed information of DEGs involved in hormone biosynthesis and signaling transduction pathway. [file Table_2.xlsx]

## Sheet: Sheet1
Hormone	Group 1	up-regulation	down-regulation	Group 2	up-regulation	down-regulation	Group 3	up-regulation	down-regulation
Auxin	0	0	0	55	13	42	74	19	55
ABA	0	0	0	12	10	2	20	18	2
BR	0	0	0	18	11	7	27	20	7
Ethylene	0	0	0	22	15	7	35	27	8
Cytokinin	0	0	0	28	11	17	39	20	19
JA	0	0	0	4	3	1	9	5	4
SA	0	0	0	5	3	2	15	11	4
GA	1	0	1	18	12	6	27	17	10
Total	1	0	1	107	65	42	172	118	54

## Sheet: Sheet2
Gene ID	Group 1	Group 2	Group 3	Description
Auxin
novel00321	NA	NA	-1.18	(at2g34680 : 401.0) isolated from differential screening of a cDNA library from auxin-treated root culture.
novel00746	NA	-1.715	-2.333	(p32295|arg7_phaau : 120.0) Indole-3-acetic acid-induced protein ARG7 - Phaseolus aureus (Mung bean) (Vigna radiata) & (at5g18020 : 112.0) SAUR-like auxin-responsive protein family ;
novel00747	NA	-1.663	-2.182	(p33081|ax15a_soybn : 112.0) Auxin-induced protein 15A - Glycine max (Soybean) & (at5g18080 : 110.0) SAUR-like auxin-responsive protein family
novel02375	NA	-0.851	-1.114	(at4g38840 : 122.0) SAUR-like auxin-responsive protein family ;
rchiobhmchr1g0383081	NA	1.215	1.383	(at5g54140 : 163.0) encodes a protein similar to IAA amino acid conjugate hydrolase; IAA-leucine-resistant (ILR1)-like 3 (ILL3);
rchiobhmchr2g0095551	NA	-0.84	-1.217	(at5g20730 : 241.0) Encodes an auxin-regulated transcriptional activator.
rchiobhmchr2g0095881	NA	1.026	NA	(at5g20820 : 99.0) SAUR-like auxin-responsive protein family ;
rchiobhmchr2g0107081	NA	2.01	2.364	(at2g14960 : 242.0) encodes a protein similar to IAA-amido synthases.
rchiobhmchr2g0107091	NA	2.006	2.293	(at2g23170 : 444.0) encodes an IAA-amido synthase that conjugates Asp and other amino acids to auxin in vitro.
rchiobhmchr2g0111231	NA	-0.882	-1.062	(at5g65470 : 126.0) O-fucosyltransferase family protein;
rchiobhmchr2g0124401	NA	-0.759	-1.198	(p32295|arg7_phaau : 129.0) Indole-3-acetic acid-induced protein ARG7 - Phaseolus aureus (Mung bean) (Vigna radiata) & (at4g38840 : 123.0) SAUR-like auxin-responsive protein family
rchiobhmchr2g0124451	NA	-2.072	-2.963	(p33083|ax6b_soybn : 125.0) Auxin-induced protein 6B - Glycine max (Soybean) & (at4g38840 : 119.0) SAUR-like auxin-responsive protein family
rchiobhmchr2g0124461	NA	-2.35	-2.901	(p32295|arg7_phaau : 117.0) Indole-3-acetic acid-induced protein ARG7 - Phaseolus aureus (Mung bean) (Vigna radiata) & (at4g38840 : 113.0) SAUR-like auxin-responsive protein family ;
rchiobhmchr2g0124531	NA	-2.123	-2.86	(at4g38840 : 125.0) SAUR-like auxin-responsive protein family ;
rchiobhmchr2g0124561	NA	-1.366	-2.223	(p32295|arg7_phaau : 112.0) Indole-3-acetic acid-induced protein ARG7 - Phaseolus aureus (Mung bean) (Vigna radiata) & (at5g18020 : 108.0) SAUR-like auxin-responsive protein family ;
rchiobhmchr2g0156851	NA	-4.554	-4.24	(at2g04850 : 567.0) Auxin-responsive family protein;
rchiobhmchr2g0162261	1.222	1.222	1.36	(at4g03400 : 389.0) Encodes a GH3-related gene involved in red light-specific hypocotyl elongation.
rchiobhmchr2g0169101	NA	-1.756	-1.301	(at5g15100 : 186.0) PIN-FORMED 8 (PIN8);
rchiobhmchr3g0448071	NA	-3.441	-3.425	(at5g16530 : 270.0) Encodes PIN5, an atypical member of the PIN family.
rchiobhmchr3g0464061	NA	1.986	2.472	(at3g54100 : 90.1) O-fucosyltransferase family protein; CONTAINS InterPro DOMAIN/s: GDP-fucose protein O-fucosyltransferase (InterPro:IPR019378);
rchiobhmchr3g0470021	NA	-0.896	-1.814	(at1g58100 : 124.0) TCP family transcription factor ;
rchiobhmchr3g0470231	NA	-0.778	-2.337	(at3g09870 : 102.0) SAUR-like auxin-responsive protein family ;
rchiobhmchr3g0471771	NA	-5.148	NaN	(at1g75590 : 98.6) SAUR-like auxin-responsive protein family ;
rchiobhmchr3g0475011	NA	1.005	1.061	(at3g02875 : 134.0) Hydrolyzes amino acid conjugates of the plant growth regulator indole-3-acetic acid (IAA), including IAA-Leu and IAA-Phe.
rchiobhmchr3g0483671	NA	-1.492	-1.952	(p33080|ax10a_soybn : 124.0) Auxin-induced protein X10A - Glycine max (Soybean) & (at4g38840 : 120.0) SAUR-like auxin-responsive protein family
rchiobhmchr4g0411011	NA	-1.132	-0.508	(at1g60680 : 174.0) NAD(P)-linked oxidoreductase superfamily protein;
rchiobhmchr4g0411051	NA	NA	1.233	(at1g60680 : 172.0) NAD(P)-linked oxidoreductase superfamily protein;
rchiobhmchr4g0411151	NA	-1.084	NA	(at1g60680 : 170.0) NAD(P)-linked oxidoreductase superfamily protein;
rchiobhmchr4g0412431	NA	1.064	1.418	(at4g15550 : 396.0) UDP-glucose:indole-3-acetate beta-D-glucosyltransferase; indole-3-acetate beta-D-glucosyltransferase (IAGLU);
rchiobhmchr4g0412481	NA	0.783	1.244	(at4g15550 : 385.0) UDP-glucose:indole-3-acetate beta-D-glucosyltransferase; indole-3-acetate beta-D-glucosyltransferase (IAGLU);
rchiobhmchr4g0412731	NA	2.432	3.697	(at4g15550 : 432.0) UDP-glucose:indole-3-acetate beta-D-glucosyltransferase; indole-3-acetate beta-D-glucosyltransferase (IAGLU);
rchiobhmchr4g0428671	NA	-1.712	-2.255	(at1g28130 : 396.0) encodes an IAA-amido synthase that conjugates Asp and other amino acids to auxin in vitro.
rchiobhmchr4g0444701	NA	NA	1.158	(at3g02875 : 110.0) Hydrolyzes amino acid conjugates of the plant growth regulator indole-3-acetic acid (IAA), including IAA-Leu and IAA-Phe.
rchiobhmchr5g0008041	NA	1.591	1.932	(at4g27450 : 159.0) Aluminium induced protein with YGL and LRDR motifs;
rchiobhmchr5g0027261	NA	5.198	5.194	(at1g53700 : 502.0) The WAG1 and its homolog, WAG2 each encodes a protein-serine/threonine kinase that are nearly 70% identical to PsPK3 protein
rchiobhmchr5g0036891	NA	-1.002	-1.205	(at5g54510 : 363.0) Encodes an IAA-amido synthase that conjugates Ala, Asp, Phe, and Trp to auxin.
rchiobhmchr5g0041561	NA	-1.082	-2.594	(at5g55250 : 181.0) Encodes an enzyme which specifically converts IAA to its methyl ester form MelIAA.
rchiobhmchr5g0056801	NA	-1.685	-1.48	(p33080|ax10a_soybn : 124.0) Auxin-induced protein X10A - Glycine max (Soybean) & (at4g34770 : 113.0) SAUR-like auxin-responsive protein family
rchiobhmchr5g0056821	NA	-0.841	-1.444	(p32295|arg7_phaau : 120.0) Indole-3-acetic acid-induced protein ARG7 - Phaseolus aureus (Mung bean) (Vigna radiata) & (at4g38840 : 116.0) SAUR-like auxin-responsive protein family ;
rchiobhmchr5g0056831	NA	-2.261	-2.572	(at4g38840 : 117.0) SAUR-like auxin-responsive protein family ;
rchiobhmchr5g0056841	NA	-1.414	-1.969	(p32295|arg7_phaau : 110.0) Indole-3-acetic acid-induced protein ARG7 - Phaseolus aureus (Mung bean) (Vigna radiata) & (at4g38840 : 102.0) SAUR-like auxin-responsive protein family ;
rchiobhmchr5g0059901	NA	-2.087	-2.631	(p33080|ax10a_soybn : 126.0) Auxin-induced protein X10A - Glycine max (Soybean) & (at4g38840 : 112.0) SAUR-like auxin-responsive protein family
rchiobhmchr5g0059921	NA	-1.984	-2.937	(p33081|ax15a_soybn : 110.0) Auxin-induced protein 15A - Glycine max (Soybean) & (at5g18020 : 108.0) SAUR-like auxin-responsive protein family
rchiobhmchr6g0246051	NA	2.996	2.868	(at4g34770 : 133.0) SAUR-like auxin-responsive protein family ;
rchiobhmchr6g0248381	NA	0.538	1.242	(at1g05680 : 282.0) Encodes a UDP-glucosyltransferase, UGT74E2,
rchiobhmchr6g0268551	NA	-2.151	-3.556	(at1g75580 : 164.0) SAUR-like auxin-responsive protein family ;
rchiobhmchr6g0268901	NA	-1.338	-2.144	(p32295|arg7_phaau : 122.0) Indole-3-acetic acid-induced protein ARG7 - Phaseolus aureus (Mung bean) (Vigna radiata) & (at4g38840 : 119.0) SAUR-like auxin-responsive protein family ;
rchiobhmchr6g0268941	NA	NA	-2.105	(p32295|arg7_phaau : 121.0) Indole-3-acetic acid-induced protein ARG7 - Phaseolus aureus (Mung bean) (Vigna radiata) & (at4g38840 : 112.0) SAUR-like auxin-responsive protein family ;
rchiobhmchr6g0268951	NA	-1.042	-1.738	(at4g38840 : 126.0) SAUR-like auxin-responsive protein family ;
rchiobhmchr6g0293491	NA	NA	NaN	(at2g47750 : 416.0) Encodes GH3.9, a member of the GH3 family auxin-responsive genes.
rchiobhmchr6g0302561	NA	6.546	7.175	(at1g19840 : 184.0) SAUR-like auxin-responsive protein family ;
rchiobhmchr7g0178461	NA	-0.921	-1.274	(at1g73590 : 588.0) Encodes an auxin efflux carrier involved in shoot and root development.
rchiobhmchr7g0179611	NA	0.537	1.128	(at1g05680 : 245.0) Encodes a UDP-glucosyltransferase, UGT74E2,
rchiobhmchr7g0181021	NA	-1.109	-1.459	(at3g47620 : 171.0) Encodes a transcription factor AtTCP14 that regulates seed germination.
rchiobhmchr7g0183771	NA	0.847	1.043	(at5g15740 : 90.9) O-fucosyltransferase family protein;
rchiobhmchr7g0210461	NA	-1.446	-1.74	(p32295|arg7_phaau : 114.0) Indole-3-acetic acid-induced protein ARG7 - Phaseolus aureus (Mung bean) (Vigna radiata) & (at4g38840 : 108.0) SAUR-like auxin-responsive protein family ;
rchiobhmchr7g0210481	NA	-1.716	-2.438	(p33080|ax10a_soybn : 122.0) Auxin-induced protein X10A - Glycine max (Soybean) & (at4g38840 : 115.0) SAUR-like auxin-responsive protein family
rchiobhmchr7g0210491	NA	-1.878	-2.008	(p32295|arg7_phaau : 111.0) Indole-3-acetic acid-induced protein ARG7 - Phaseolus aureus (Mung bean) (Vigna radiata) & (at3g03840 : 109.0) SAUR-like auxin-responsive protein family ;
rchiobhmchr7g0210511	NA	-1.528	-2.398	(p33080|ax10a_soybn : 123.0) Auxin-induced protein X10A - Glycine max (Soybean) & (at4g38840 : 107.0) SAUR-like auxin-responsive protein family
rchiobhmchr7g0210531	NA	-2.318	-3.88	(p33081|ax15a_soybn : 110.0) Auxin-induced protein 15A - Glycine max (Soybean) & (at5g18080 : 108.0) SAUR-like auxin-responsive protein family
rchiobhmchr7g0210621	NA	-0.952	-1.392	(p32295|arg7_phaau : 127.0) Indole-3-acetic acid-induced protein ARG7 - Phaseolus aureus (Mung bean) (Vigna radiata) & (at4g38840 : 122.0) SAUR-like auxin-responsive protein family ;
rchiobhmchr7g0210641	NA	-1.443	-2.175	(p32295|arg7_phaau : 130.0) Indole-3-acetic acid-induced protein ARG7 - Phaseolus aureus (Mung bean) (Vigna radiata) & (at4g38840 : 119.0) SAUR-like auxin-responsive protein family ;
rchiobhmchr7g0210661	NA	NA	-1.321	(p33081|ax15a_soybn : 111.0) Auxin-induced protein 15A - Glycine max (Soybean) & (at5g18080 : 107.0) SAUR-like auxin-responsive protein family
rchiobhmchr7g0210681	NA	-0.786	-1.362	(p32295|arg7_phaau : 125.0) Indole-3-acetic acid-induced protein ARG7 - Phaseolus aureus (Mung bean) (Vigna radiata) & (at4g38840 : 120.0) SAUR-like auxin-responsive protein family ;
rchiobhmchr7g0210711	NA	-1.002	-1.094	(p32295|arg7_phaau : 124.0) Indole-3-acetic acid-induced protein ARG7 - Phaseolus aureus (Mung bean) (Vigna radiata) & (at4g38840 : 118.0) SAUR-like auxin-responsive protein family ;
rchiobhmchr7g0210731	NA	-1.115	-1.588	(p32295|arg7_phaau : 128.0) Indole-3-acetic acid-induced protein ARG7 - Phaseolus aureus (Mung bean) (Vigna radiata) & (at4g38840 : 121.0) SAUR-like auxin-responsive protein family ;
rchiobhmchr7g0210801	NA	-1.135	-1.537	(p32295|arg7_phaau : 127.0) Indole-3-acetic acid-induced protein ARG7 - Phaseolus aureus (Mung bean) (Vigna radiata) & (at4g38840 : 121.0) SAUR-like auxin-responsive protein family ;
rchiobhmchr7g0210851	NA	-2.337	-3.666	(p33080|ax10a_soybn : 116.0) Auxin-induced protein X10A - Glycine max (Soybean) & (at5g18020 : 107.0) SAUR-like auxin-responsive protein family
rchiobhmchr7g0210871	NA	-1.857	-3.861	(p32295|arg7_phaau : 112.0) Indole-3-acetic acid-induced protein ARG7 - Phaseolus aureus (Mung bean) (Vigna radiata) & (at5g18080 : 107.0) SAUR-like auxin-responsive protein family ;
rchiobhmchr7g0210881	NA	-1.323	-2.118	(p33081|ax15a_soybn : 118.0) Auxin-induced protein 15A - Glycine max (Soybean) & (at5g18020 : 112.0) SAUR-like auxin-responsive protein family
rchiobhmchr7g0210891	NA	-0.816	-1.529	(p33080|ax10a_soybn : 108.0) Auxin-induced protein X10A - Glycine max (Soybean) & (at5g18020 : 103.0) SAUR-like auxin-responsive protein family
rchiobhmchr7g0211101	NA	-1.183	-1.6	(p32295|arg7_phaau : 125.0) Indole-3-acetic acid-induced protein ARG7 - Phaseolus aureus (Mung bean) (Vigna radiata) & (at4g38840 : 122.0) SAUR-like auxin-responsive protein family ;
rchiobhmchr7g0211121	NA	NA	-1.382	(at4g38840 : 124.0) SAUR-like auxin-responsive protein family ;
rchiobhmchr7g0211131	NA	-1.402	-2.299	(p32295|arg7_phaau : 119.0) Indole-3-acetic acid-induced protein ARG7 - Phaseolus aureus (Mung bean) (Vigna radiata) & (at4g38840 : 112.0) SAUR-like auxin-responsive protein family ;
rchiobhmchr7g0211151	NA	-1.886	-3.105	(p33083|ax6b_soybn : 124.0) Auxin-induced protein 6B - Glycine max (Soybean) & (at4g38840 : 119.0) SAUR-like auxin-responsive protein family
rchiobhmchr7g0211501	NA	-2.459	-3.47	(p32295|arg7_phaau : 125.0) Indole-3-acetic acid-induced protein ARG7 - Phaseolus aureus (Mung bean) (Vigna radiata) & (at4g38840 : 112.0) SAUR-like auxin-responsive protein family ;
rchiobhmchr7g0211511	NA	-2.405	-3.27	(p32295|arg7_phaau : 123.0) Indole-3-acetic acid-induced protein ARG7 - Phaseolus aureus (Mung bean) (Vigna radiata) & (at4g38840 : 117.0) SAUR-like auxin-responsive protein family ;
ABA
novel03574	NA
rchiobhmchr1g0339921	NA	NA	1.996	(at3g21790 : 390.0) UDP-Glycosyltransferase superfamily protein; FUNCTIONS IN: transferase activity, transferring hexosyl groups, UDP-glycosyltransferase activity;
rchiobhmchr1g0339941	NA	NA	1.488	(at3g21760 : 449.0) Encodes HYR1, a UDP glycosyltransferase (UGT).
rchiobhmchr1g0339981	NA	NA	1.139	(at3g21760 : 463.0) Encodes HYR1, a UDP glycosyltransferase (UGT).
rchiobhmchr1g0340061	NA	NA	1.954	(at3g21760 : 463.0) Encodes HYR1, a UDP glycosyltransferase (UGT).
rchiobhmchr2g0094051	NA	2.504	3.164	(at5g57050 : 81.6) Encodes a protein phosphatase 2C and is involved in ABA signal transduction.
rchiobhmchr2g0153261	NA	2.98	3.603	(at3g21760 : 240.0) Encodes HYR1, a UDP glycosyltransferase (UGT).
rchiobhmchr2g0153271	NA	2.781	3.25	(at3g21780 : 173.0) Encodes a protein with UDP-glucosyl transferase activity
rchiobhmchr2g0153321	NA	NA	1.57	(at3g21760 : 410.0) Encodes HYR1, a UDP glycosyltransferase (UGT).
rchiobhmchr2g0153461	NA	NA	1.895	(at3g21760 : 461.0) Encodes HYR1, a UDP glycosyltransferase (UGT).
rchiobhmchr2g0153471	NA	NA	1.648	(at3g21760 : 422.0) Encodes HYR1, a UDP glycosyltransferase (UGT).
rchiobhmchr2g0176291	0.835	NA	1.453	(at5g13200 : 229.0) GRAM domain family protein;
rchiobhmchr3g0460501	NA	1.583	1.8	(at4g32010 : 150.0) HSI2-like 1 (HSL1);
rchiobhmchr3g0475081	NA	-2.502	NA	(at1g52340 : 247.0) ABA DEFICIENT 2, ABA2, involved in ABA biosynthesis.
rchiobhmchr4g0397001	NA	1.886	1.417	(at3g24220 : 714.0) NCED6, a key enzyme in the biosynthesis of abscisic acid
rchiobhmchr4g0429311	NA	1.149	1.536	(at5g13200 : 264.0) GRAM domain family protein;
rchiobhmchr4g0446971	NA	-1.197	-1.277	(at5g08350 : 192.0) GRAM domain-containing protein / ABA-responsive protein-related;
rchiobhmchr5g0021101	NA	1.282	2.207	(at3g21760 : 349.0) Encodes HYR1, a UDP glycosyltransferase (UGT).
rchiobhmchr5g0027901	NA	2.871	3.841	(at3g14440 : 841.0) NCED3
rchiobhmchr5g0034611	NA	-0.583	-1.109	(at2g20770 : 182.0) Encodes a protein with reported similarity to GCR2 a putative G protein coupled receptor thought to be an ABA receptor.
rchiobhmchr5g0049511	NA	1.327	1.626	(at2g27150 : 584.0) ABSCISIC ALDEHYDE OXIDASE 3, AAO3, involved in the final step in abscisic acid biosynthesis.
BR
novel00019	NA	2.386	1.929	(at2g07050 : 136.0) CYCLOARTENOL SYNTHASE 1, CAS1, Involved in the biosynthesis of brassinosteroids
novel00445	NA	-2.073	NA	(at2g22830 : 442.0) squalene epoxidase 2 (SQE2)
novel01839	NA	-1.568	-1.561	(at4g37760 : 705.0) squalene epoxidase 3 (SQE3)
novel02837	NA	1.546	3.349	(at4g37760 : 274.0) squalene epoxidase 3 (SQE3)
novel02838	NA	2.001	NA	(at4g37760 : 363.0) squalene epoxidase 3 (SQE3)
novel02841	NA	1.403	2.519	(at4g37760 : 437.0) squalene epoxidase 3 (SQE3)
novel03074	NA	NA	2.064	(at4g37760 : 490.0) squalene epoxidase 3 (SQE3)
novel03076	NA	NA	1.577	(at4g37760 : 573.0) squalene epoxidase 3 (SQE3)
novel03541	NA	-2.349	-2.661	(at1g58440 : 211.0) Encodes a putative protein that has been speculated, to have squalene monooxygenase activity. XF1
rchiobhmchr0c45g0503831	NA	NA	4.111	(at3g45130 : 92.0) lanosterol synthase 1 (LAS1)
rchiobhmchr1g0371271	NA	NA	NaN	(at3g51740 : 522.0) encodes a leucine-repeat receptor kinase expressed in inflorescence meristem
rchiobhmchr2g0101791	NA	1.257	1.812	(at3g50660 : 103.0) DWF4, The protein is a member of CYP90B gene family, whose reaction is a rate-limiting step in brassinosteroid biosynthetic pathway
rchiobhmchr2g0142901	NA	-2.204	-3.192	(at3g13730 : 154.0) CYP90D1, Encodes a cytochrome P-450 gene that is involved in brassinosteroid biosynthesis
rchiobhmchr2g0148951	NA	-1.384	NA	(at2g07050 : 88.6) CAS1, Involved in the biosynthesis of brassinosteroids. Catalyzes the reaction from epoxysqualene to cycloartenol
rchiobhmchr2g0165861	NA	-1.484	-1.804	(at3g02110 : 89.0) serine carboxypeptidase-like 25 (scpl25)
rchiobhmchr3g0463931	NA	NA	-1.935	(at2g38050 : 390.0) Similar to mammalian steroid-5-alpha-reductase
rchiobhmchr4g0386051	NA	-1.073	-1.573	(at1g20330 : 639.0) Encodes a sterol-C24-methyltransferases involved in sterol biosynthesis
rchiobhmchr4g0397271	NA	NA	3.365	(at3g45130 : 87.4) lanosterol synthase 1 (LAS1)
rchiobhmchr4g0397321	NA	2.114	1.509	(at3g45130 : 94.7) lanosterol synthase 1 (LAS1)
rchiobhmchr4g0403901	NA	NA	NaN	(at3g18810 : 162.0) Protein kinase superfamily protein
rchiobhmchr4g0425121	NA	NaN	NaN	(at5g21090 : 130.0) Leucine-rich repeat (LRR) family protein
rchiobhmchr4g0437381	NA	NA	-2.82	(at2g03760 : 369.0) Encodes a brassinosteroid sulfotransferase
rchiobhmchr4g0437751	NA	1.236	1.569	(at3g14630 : 159.0) putative cytochrome P450
rchiobhmchr5g0011971	NA	1.03	1.262	(at1g78700 : 223.0) BES1/BZR1 homolog 4 (BEH4)
rchiobhmchr5g0074401	NA	0.61	1.24	(at1g55610 : 1471.0) LRR Receptor Kinase; BRI1 like (BRL1)
rchiobhmchr6g0262341	NA	0.628	1.033	(at5g16010 : 178.0) 3-oxo-5-alpha-steroid 4-dehydrogenase family protein
rchiobhmchr6g0262351	NA	0.792	1.067	(at5g16010 : 192.0) 3-oxo-5-alpha-steroid 4-dehydrogenase family protein
rchiobhmchr7g0182251	NA	NA	2.276	(at1g74360 : 1102.0) Leucine-rich repeat protein kinase family protein
rchiobhmchr7g0197001	NA	1.283	1.593	(at3g61460 : 196.0) Encodes a novel ring finger protein and forms an N-terminal hydrophobic domain and a C-terminal RING-H2 signature
rchiobhmchr7g0213311	NA	4.722	4.491	(at1g25320 : 93.6) Leucine-rich repeat protein kinase family protein
Ethylene
rchiobhmchr2g0087171	NA	0.956	1.154	(at5g20400 : 82.4) encodes a protein whose sequence is similar to flavanone 3 hydroxylase from Malus
rchiobhmchr2g0087191	NA	1.19	1.321	(at5g20400 : 86.7) encodes a protein whose sequence is similar to flavanone 3 hydroxylase from Malus
rchiobhmchr2g0087201	NA	NA	1.504	(at1g49390 : 160.0) 2-oxoglutarate (2OG) and Fe(II)-dependent oxygenase superfamily protein
rchiobhmchr2g0087211	NA	NA	1.132	(at1g60860 : 121.0) A member of ARF GAP domain (AGD)
rchiobhmchr2g0087261	NA	-2.154	-1.598	(at5g20400 : 90.1) encodes a protein whose sequence is similar to flavanone 3 hydroxylase from Malus
rchiobhmchr2g0107611	NA	NA	-1.526	(at2g23060 : 466.0) Acyl-CoA N-acyltransferases (NAT) superfamily protein
rchiobhmchr2g0135921	NA	-2.964	-4.174	(at1g15360 : 143.0) Encodes a member of the ERF (ethylene response factor) subfamily B-6 of ERF/AP2 transcription factor family
rchiobhmchr3g0474401	NA	3.438	3.541	(at1g03400 : 119.0) A single copy gene that encodes a protein with sequence similarity to tomato E8 (ACC oxidase, the last step in ethylene biosynthesis) involved in ethylene synthesis and fruit ripening in tomato
rchiobhmchr3g0474491	NA	3.765	5.172	(at1g06620 : 221.0) encodes a protein whose sequence is similar to a 2-oxoglutarate-dependent dioxygenase
rchiobhmchr3g0477711	NA	-2.959	NaN	(at3g11930 : 88.6) Adenine nucleotide alpha hydrolases-like superfamily protein
rchiobhmchr3g0483171	NA	NA	1.379	(at3g50170 : 107.0) Plant protein of unknown function (DUF247)
rchiobhmchr4g0391281	NA	2.143	2.301	(at3g23150 : 629.0) Involved in ethylene perception in Arabidopsis
rchiobhmchr4g0391961	NA	-1.632	NA	(at1g06650 : 179.0) encodes a protein whose sequence is similar to 2-oxoglutarate-dependent dioxygenase
rchiobhmchr4g0391971	-2.104	-2.104	-1.116	(at1g06620 : 188.0) encodes a protein whose sequence is similar to a 2-oxoglutarate-dependent dioxygenase
rchiobhmchr4g0392071	NA	NA	1.002	(at1g06620 : 187.0) encodes a protein whose sequence is similar to a 2-oxoglutarate-dependent dioxygenase
rchiobhmchr4g0392451	NA	6.508	5.929	(at3g23220 : 91.7) encodes a member of the ERF (ethylene response factor) subfamily B-3 of ERF/AP2 transcription factor family
rchiobhmchr4g0392501	NA	3.952	4.391	(at3g23240 : 189.0) encodes a member of the ERF (ethylene response factor) subfamily B-3 of ERF/AP2 transcription factor family (ERF1)
rchiobhmchr5g0001831	NA	1.261	1.486	(at1g12010 : 130.0) Encodes a protein that appears to have 1-amino-cyclopropane-1-carboxylic acid oxidase activity based on mutant analyses
rchiobhmchr5g0008991	NA	1.512	1.757	(at5g44210 : 103.0) encodes a member of the ERF (ethylene response factor) subfamily B-1 of ERF/AP2 transcription factor family (ATERF-9)
rchiobhmchr5g0009711	NA	NA	1.659	(at5g47220 : 108.0) Encodes a member of the ERF (ethylene response factor) subfamily B-3 of ERF/AP2 transcription factor family (ATERF-2)
rchiobhmchr5g0032721	NA	1.146	1.864	(at3g15210 : 97.8) Encodes a member of the ERF (ethylene response factor) subfamily B-1 of ERF/AP2 transcription factor family (ATERF-4)
rchiobhmchr5g0070171	NA	NA	-1.342	(at5g58660 : 111.0) 2-oxoglutarate (2OG) and Fe(II)-dependent oxygenase superfamily protein
rchiobhmchr6g0269291	NA	NA	4.54	(at4g31980 : 221.0) unknown protein
rchiobhmchr6g0288231	NA	3.179	3.066	(at3g23240 : 130.0) encodes a member of the ERF (ethylene response factor) subfamily B-3 of ERF/AP2 transcription factor family (ERF1)
rchiobhmchr6g0288551	NA	NA	-1.695	(at1g06620 : 157.0) encodes a protein whose sequence is similar to a 2-oxoglutarate-dependent dioxygenase; 2-oxoglutarate (2OG) and Fe(II)-dependent oxygenase superfamily protein
rchiobhmchr6g0288681	NA	NA	1.058	(at5g59540 : 88.6) 2-oxoglutarate (2OG) and Fe(II)-dependent oxygenase superfamily protein
rchiobhmchr6g0294491	NA	1.902	1.804	(at2g40940 : 480.0) Ethylene receptor, subfamily 1
rchiobhmchr6g0298011	NA	-3.087	-4.219	(at5g11190 : 133.0) encodes a member of the ERF (ethylene response factor) subfamily B-6 of ERF/AP2 transcription factor family
rchiobhmchr6g0298261	NA	0.563	1.391	(at4g31980 : 296.0) unknown protein
rchiobhmchr6g0298291	NA	NA	2.508	(at4g31980 : 266.0) unknown protein
rchiobhmchr6g0298331	NA	1.881	NA	(at4g31980 : 271.0) unknown protein
rchiobhmchr6g0299771	NA	3.785	3.814	(at5g25190 : 121.0) encodes a member of the ERF (ethylene response factor) subfamily B-6 of ERF/AP2 transcription factor family
rchiobhmchr6g0310191	NA	NA	1.934	(at4g37770 : 435.0) Encodes an auxin inducible ACC synthase
rchiobhmchr6g0310751	NA	NA	3.254	(at1g06650 : 136.0) encodes a protein whose sequence is similar to 2-oxoglutarate-dependent dioxygenase
rchiobhmchr7g0204641	NA	1.554	1.66	(at5g47220 : 97.4) Encodes a member of the ERF (ethylene response factor) subfamily B-3 of ERF/AP2 transcription factor family (ATERF-2)
rchiobhmchr7g0230931	NA	-1.923	-3.191	(at1g15360 : 114.0) Encodes a member of the ERF (ethylene response factor) subfamily B-6 of ERF/AP2 transcription factor family
Cytokinin
novel00267	NA	-1.716	-2.074	(at3g55700 : 463.0) UDP-Glycosyltransferase superfamily protein
novel03121	NA	1.478	2.184	(at4g34135 : 134.0) The At4g34135 gene encodes a flavonol 7-O-glucosyltransferase (EC 2.4.1.237) that glucosylates also with a 20 fold lower activity flavonols (kaempferol and quercetin) at the 3-O-position
rchiobhmchr1g0319331	NA	1.773	1.118	(at3g63440 : 252.0) This gene used to be called AtCKX7.
rchiobhmchr1g0340871	NA	-2.041	-1.625	(at1g22380 : 351.0) Encodes a putative UDP-glucosyl transferase
rchiobhmchr1g0368931	NA	-3.581	-3.596	(at3g11340 : 318.0) UDP-Glycosyltransferase superfamily protein
rchiobhmchr2g0093491	NA	NA	NaN	(at5g56970 : 167.0) It encodes a protein whose sequence is similar to cytokinin oxidase/dehydrogenase, which catalyzes the degradation of cytokinins.; cytokinin oxidase 3 (CKX3)
rchiobhmchr2g0112881	NA	NA	1.284	(at1g22380 : 337.0) Encodes a putative UDP-glucosyl transferase
rchiobhmchr2g0112891	NA	NA	1.243	(at1g22370 : 335.0) UDP-glucosyl transferase 85A5 (UGT85A5)
rchiobhmchr2g0112921	NA	NA	1.622	(at1g22380 : 343.0) Encodes a putative UDP-glucosyl transferase
rchiobhmchr2g0113011	NA	1.884	2.443	(at1g22400 : 280.0) UGT85A1
rchiobhmchr2g0153971	NA	-4.674	-5.046	(at1g22380 : 362.0) Encodes a putative UDP-glucosyl transferase
rchiobhmchr2g0154001	NA	NA	-4.088	(at1g22380 : 352.0) Encodes a putative UDP-glucosyl transferase
rchiobhmchr2g0154061	NA	NA	1.119	(at1g22380 : 334.0) Encodes a putative UDP-glucosyl transferase
rchiobhmchr2g0154191	NA	NA	2.115	(at1g22360 : 313.0) UDP-glucosyl transferase 85A2 (UGT85A2)
rchiobhmchr2g0154221	NA	-2.57	NA	(at1g22380 : 370.0) Encodes a putative UDP-glucosyl transferase
rchiobhmchr2g0154241	NA	-1.302	-1.565	(at1g22360 : 281.0) UDP-glucosyl transferase 85A2 (UGT85A2)
rchiobhmchr2g0154251	NA	-2.342	-2.23	(at1g78270 : 97.4) UDP-glucosyl transferase 85A4 (UGT85A4)
rchiobhmchr2g0154301	NA	-2.656	-2.548	(at1g22360 : 324.0) UDP-glucosyl transferase 85A2 (UGT85A2)
rchiobhmchr2g0154341	NA	0.855	2.197	(at1g22380 : 335.0) Encodes a putative UDP-glucosyl transferase
rchiobhmchr2g0154351	NA	1.382	3.015	(at1g22380 : 363.0) Encodes a putative UDP-glucosyl transferase
rchiobhmchr3g0464341	NA	1.553	1.998	(at1g22400 : 186.0) UGT85A1
rchiobhmchr3g0480671	0.882	0.882	1.297	(at1g22360 : 206.0) UDP-glucosyl transferase 85A2 (UGT85A2)
rchiobhmchr4g0418401	NA	6.973	7.532	(at5g19040 : 340.0) Encodes cytokinin synthase isopentenyltransferase 5 (IPT5)
rchiobhmchr4g0442181	NA	2.244	2.572	(at2g01830 : 99.4) Histidine kinase: cytokinin-binding receptor
rchiobhmchr4g0445311	NA	-2.66	-2.613	(at1g22360 : 320.0) UDP-glucosyl transferase 85A2 (UGT85A2)
rchiobhmchr5g0029061	NA	NA	-2.764	(at1g22380 : 364.0) Encodes a putative UDP-glucosyl transferase
rchiobhmchr5g0029151	NA	-1.079	-1.793	(at1g22370 : 192.0) UDP-glucosyl transferase 85A5 (UGT85A5)
rchiobhmchr5g0029421	NA	2.633	3.101	(at1g68460 : 291.0) Encodes a putative adenylate isopentenyltransferase
rchiobhmchr5g0038461	NA	-3.153	-4.149	(at1g22380 : 371.0) Encodes a putative UDP-glucosyl transferase
rchiobhmchr5g0038821	NA	-3.32	-4.099	(at1g22380 : 377.0) Encodes a putative UDP-glucosyl transferase
rchiobhmchr6g0291431	NA	-1.982	-1.968	(at3g63110 : 342.0) Encodes cytokinin synthase involved in cytokinin biosynthesis
rchiobhmchr6g0301781	NA	1.088	1.581	(at1g75450 : 251.0) cytokinin oxidase/dehydrogenase AtCKX6
rchiobhmchr7g0211221	NA	NaN	NaN	(at1g22380 : 361.0) Encodes a putative UDP-glucosyl transferase
rchiobhmchr7g0231031	NA	-2.563	-3.359	(at1g22370 : 207.0) UDP-glucosyl transferase 85A5 (UGT85A5)
rchiobhmchr7g0231091	NA	-2.725	-3.567	(at1g22360 : 380.0) UDP-glucosyl transferase 85A2 (UGT85A2)
rchiobhmchr7g0243721	NA	-4.086	-4.129	(at1g22380 : 140.0) Encodes a putative UDP-glucosyl transferase 85A3 (UGT85A3)
rchiobhmchr7g0243731	NA	1.41	2.073	(at1g22360 : 394.0) UDP-glucosyl transferase 85A2 (UGT85A2)
rchiobhmchr7g0243791	NA	NA	-1.734	(at1g22400 : 385.0) UGT85A1
rchiobhmchr7g0243821	NA	-1.167	-1.418	(at1g22380 : 370.0) Encodes a putative UDP-glucosyl transferase 85A3 (UGT85A3)
Jasmonate
novel01210	NA	NA	-1.131	(at3g11480 : 111.0) S-adenosyl-L-methionine-dependent methyltransferases superfamily protein BSMT1
rchiobhmchr2g0167371	NA	1.03	1.427	(at1g76690 : 329.0) Encodes one of the closely related 12-oxophytodienoic acid reductases OPR2
rchiobhmchr3g0455111	NA	1.783	2.229	(p37831|lox1_soltu : 391.0) Lipoxygenase 1
rchiobhmchr5g0008511	NA	NA	-1.096	(at1g72520 : 359.0) LOX4
rchiobhmchr6g0261011	NA	NA	2.819	(at5g42650 : 523.0) AOS, Encodes a member of the cytochrome p450 CYP74 gene family
rchiobhmchr6g0261031	NA	2.099	2.407	(at5g42650 : 537.0) AOS, Encodes a member of the cytochrome p450 CYP74 gene family
rchiobhmchr6g0265391	NA	-0.681	-1.305	(at3g11480 : 89.4) The gene encodes a SABATH methyltransferase
rchiobhmchr6g0300221	NA	0.943	1.174	(at5g42650 : 680.0) AOS, Encodes a member of the cytochrome p450 CYP74 gene family
rchiobhmchr7g0230351	NA	-1.35	-1.166	(at1g76690 : 322.0) Encodes one of the closely related 12-oxophytodienoic acid reductases (OPR2)
SA
novel01210	NA	NA	-1.131	(at3g11480 : 111.0) The gene encodes a SABATH methyltransferase that methylates both salicylic acid and benzoic acid
novel01210	NA	NA	-1.131	(at3g11480 : 111.0) The gene encodes a SABATH methyltransferase that methylates both salicylic acid and benzoic acid
rchiobhmchr1g0327241	NA	NA	2.23	(at1g15125 : 218.0) S-adenosyl-L-methionine-dependent methyltransferases superfamily protein
rchiobhmchr2g0084841	NA	NaN	NaN	(at1g05675 : 122.0) UDP-Glycosyltransferase superfamily protein
rchiobhmchr2g0100891	NA	1.475	1.844	(at4g36470 : 140.0) S-adenosyl-L-methionine-dependent methyltransferases superfamily protein
rchiobhmchr6g0248381	NA	0.538	1.242	(at1g05680 : 282.0) Encodes a UDP-glucosyltransferase, UGT74E2
rchiobhmchr6g0248391	NA	0.591	1.248	(at2g43820 : 166.0) Induced by Salicylic acid, virus, fungus and bacteria
rchiobhmchr6g0248401	NA	1.076	1.741	(at1g05680 : 301.0) Encodes a UDP-glucosyltransferase, UGT74E2
rchiobhmchr6g0248411	NA	0.725	1.514	(at1g05680 : 296.0) Encodes a UDP-glucosyltransferase, UGT74E2
rchiobhmchr6g0265391	NA	-0.681	-1.305	(at3g11480 : 89.4) The gene encodes a SABATH methyltransferase that methylates both salicylic acid and benzoic acid
rchiobhmchr6g0282101	NA	NA	-1.016	(at1g05680 : 259.0) Encodes a UDP-glucosyltransferase, UGT74E2
rchiobhmchr7g0179031	NA	NA	1.07	(at1g68040 : 211.0) S-adenosyl-L-methionine-dependent methyltransferases superfamily protein
rchiobhmchr7g0179611	NA	0.537	1.128	(at1g05680 : 245.0) Encodes a UDP-glucosyltransferase, UGT74E2
rchiobhmchr7g0187641	NA	NA	-4.569	(at1g68040 : 218.0) S-adenosyl-L-methionine-dependent methyltransferases superfamily protein
GA
rchiobhmchr2g0137231	NA	-5.718	-6.601	(at1g80340 : 240.0) gibberellin 3-oxidase 2 (GA3OX2)
rchiobhmchr1g0353791	NA	NA	-3.366	(at4g25420 : 187.0) GA20OX1; involved in the later steps of the gibberellin biosynthetic pathway
rchiobhmchr7g0181391	NA	-2.145	-3.06	(at1g74670 : 132.0) GAST1 Gibberellin-regulated family protein
rchiobhmchr2g0089571	NA	-1.696	-2.092	(at1g14920 : 375.0) GIBBERELLIC ACID INSENSITIVE (GAI); Repressor of GA responses and involved in gibberellic acid mediated signaling
rchiobhmchr1g0341371	NA	-2.394	-2.047	(at1g05160 : 236.0) Cytochrome P450, a member of the CYP88A cytochrome p450 family
rchiobhmchr1g0351591	NA	-1.525	-2.038	(at4g25420 : 192.0) GA20OX1; Encodes gibberellin 20-oxidase that is involved in the later steps of the gibberellin biosynthetic pathway
rchiobhmchr3g0493011	NA	-0.871	-1.404	(q84tq7|gai_goshi : 704.0) DELLA protein GAI (Gibberellic acid-insensitive mutant protein)
rchiobhmchr1g0376161	NA	-1.817	-1.154	(at4g25420 : 213.0) GA20OX1; Encodes gibberellin 20-oxidase that is involved in the later steps of the gibberellin biosynthetic pathway.
rchiobhmchr4g0443621	NA	1.129	0.939	(q6ei05|gaipb_cucma : 803.0) DELLA protein GAIP-B (Gibberellic acid-insensitive phloem protein B)
rchiobhmchr2g0085151	NA	NA	1.11	(at1g15540 : 166.0) 2-oxoglutarate (2OG) and Fe(II)-dependent oxygenase superfamily protein
rchiobhmchr6g0254301	NA	0.966	1.207	(at2g14900 : 96.7) Gibberellin-regulated family protein
rchiobhmchr4g0442301	NA	NA	1.229	(at5g37490 : 343.0) ARM repeat superfamily protein
rchiobhmchr1g0334761	NA	NA	1.249	(at1g66350 : 142.0) RGL1, Negative regulator of GA responses, member of GRAS family of transcription factors
rchiobhmchr5g0023471	NA	1.455	1.404	(at1g79460 : 95.5) GA REQUIRING 2 (GA2)
rchiobhmchr5g0050321	0.915	NA	1.427	(at1g52800 : 125.0) 2-oxoglutarate (2OG) and Fe(II)-dependent oxygenase superfamily protein
rchiobhmchr7g0236321	NA	1.902	1.624	(at1g15550 : 210.0) gibberellin 3-oxidase 1 (GA3OX1)
rchiobhmchr3g0493101	NA	NA	1.65	(at3g02885 : 92.0) GAST1 protein homolog 5 (GASA5)
rchiobhmchr5g0050341	NA	NA	1.716	(at1g52800 : 107.0) 2-oxoglutarate (2OG) and Fe(II)-dependent oxygenase superfamily protein
rchiobhmchr6g0292241	NA	1.684	1.804	(at3g63010 : 532.0) GA INSENSITIVE DWARF1B (GID1B); Encodes a gibberellin (GA) receptor ortholog of the rice GA receptor gene (OsGID1)
rchiobhmchr7g0177891	NA	NA	2.403	(at5g37490 : 295.0) GLY protein 1, ARM repeat superfamily protein
rchiobhmchr5g0027981	NA	1.752	2.428	(q9sq80|g2ox1_pea : 121.0) GA 2-oxidase 1, Gibberellin 2-beta-dioxygenase 1
rchiobhmchr4g0426161	NA	2.101	2.699	(q9xhm5|g2ox2_pea : 152.0) GA 2-oxidase 2
rchiobhmchr3g0492391	NA	1.166	2.806	(at5g37490 : 385.0) ARM repeat superfamily protein
rchiobhmchr6g0309121	-1.203	3.196	2.937	(at5g59845 : 119.0) Gibberellin-regulated family protein
rchiobhmchr1g0368171	NA	2.378	3.178	(at4g14465 : 134.0) AT-hook motif nuclear-localized protein 20 (AHL20)
rchiobhmchr5g0014211	NA	NaN	NaN	(at1g30040 : 174.0) gibberellin 2-oxidase (GA2OX2)
