# Supplementary material for: RhWRKY33 Positively Regulates Onset of Floral Senescence by Responding to Wounding- and Ethylene-Signaling in Rose Plants
Source: Front Plant Sci. 2021 Nov 5;12:726797. doi: 10.3389/fpls.2021.726797 (PMC8602865; doi:10.3389/fpls.2021.726797)
Supplement: Supplementary Table 3 — Detailed information of DEGs related to transcription factors. [file Table_3.xlsx]

## Sheet: Sheet1
TF families	Group 1	up-regulation	down-regulation	Group 2	up-regulation	down-regulation	Group 3	up-regulation	down-regulation
ARF	0	0	0	2	1	1	4	1	3
WRKY	3	3	0	7	7	0	10	10	0
MYB	0	0	0	12	8	4	12	7	5
MYB-relate	0	0	0	2	2	0	3	2	1
bHLH	0	0	0	8	4	4	10	5	5
HB	1	0	1	7	4	3	8	5	3
HSF	0	0	0	1	0	1	2	1	1
MADS	0	0	0	0	0	0	0	0	0
NAC	0	0	0	1	0	1	1	0	1
bZIP	0	0	0	3	2	1	5	4	1
C2C2-gata	0	0	0	2	0	2	2	0	2
C2H2	0	0	0	9	5	4	10	5	5
C3H	0	0	0	1	1	0	3	3	0
C2C2-CO-like	0	0	0	7	2	5	7	2	5
C2C2-Dof	0	0	0	6	1	5	8	3	5
C2C2-YABBY	0	0	0	0	0	0	0	0	0
AP2-EREBP	0	0	0	14	11	3	16	13	3
Total	4	3	1	82	48	34	101	61	40

## Sheet: Sheet2
Gene ID	Group 1	Group 2	Group 3	Description
bHLH
novel00937	NA	-3.239	-3.675	(at1g26945 : 118.0) Encodes a basic helix-loop-helix (bHLH) protein involved in blue/far-red light signaling
novel01437	NA	-0.801	-1.208	(at5g62610 : 196.0) basic helix-loop-helix (bHLH) DNA-binding superfamily protein
rchiobhmchr1g0348781	0.955	NA	1.478	(at4g00050 : 96.3) unfertilized embryo sac 10 (UNE10);
rchiobhmchr1g0370561	NA	-1.154	-0.818	(at2g40200 : 115.0) basic helix-loop-helix (bHLH) DNA-binding superfamily protein;
rchiobhmchr2g0105811	NA	4.362	5.116	(at5g67060 : 137.0) HECATE 1 (HEC1);
rchiobhmchr2g0141851	NA	NA	4.525	(at3g21330 : 214.0) basic helix-loop-helix (bHLH) DNA-binding superfamily protein;
rchiobhmchr3g0457291	NA	-1.062	-1.202	(at1g09250 : 100.0) basic helix-loop-helix (bHLH) DNA-binding superfamily protein;
rchiobhmchr3g0462431	NA	-3.582	-4.764	(at5g01310 : 119.0) Encodes a protein that has adenylylsulfate sulfohydrolase activity (E.C. 3.6.2.1) in vitro.;
rchiobhmchr3g0480751	NA	-0.835	-1.188	(at3g57800 : 109.0) basic helix-loop-helix (bHLH) DNA-binding superfamily protein;
rchiobhmchr6g0283511	NA	2.971	3.055	(at5g48560 : 105.0) basic helix-loop-helix (bHLH) DNA-binding superfamily protein;
rchiobhmchr6g0308101	NA	3.133	3.23	(at3g50330 : 138.0) HECATE 2 (HEC2);
rchiobhmchr7g0181001	NA	0.995	1.182	(at3g47640 : 95.1) Encodes POPEYE (PYE), a bHLH transcription factor regulating response to iron deficiency in Arabidopsis roots.;
rchiobhmchr7g0187141	NA	1.204	1.456	(at1g32640 : 119.0) Encodes a MYC-related transcriptional activator with a typical DNA binding domain of a basic helix-loop-helix leucine zipper motif.
AP2-EREBP
rchiobhmchr1g0346421	NA	-1.36	-1.841	(at2g44940 : 114.0) encodes a member of the DREB subfamily A-4 of ERF/AP2 transcription factor family.
rchiobhmchr1g0360021	NA	-3.491	-5.261	(at1g01250 : 171.0) encodes a member of the DREB subfamily A-4 of ERF/AP2 transcription factor family.
rchiobhmchr1g0380021	NA	1.259	NA	(at5g53290 : 168.0) encodes a member of the ERF (ethylene response factor) subfamily B-5 of ERF/AP2 transcription factor family.
rchiobhmchr2g0115041	NA	1.019	1.99	(at1g78080 : 194.0) Encodes a member of the DREB subfamily A-6 of ERF/AP2 transcription factor family (RAP2.4).
rchiobhmchr2g0118211	NA	1.401	1.949	(at5g64750 : 124.0) Encodes a putative transcription factor containing an AP2 domain. Is a member of the ERF (ethylene response factor) subfamily B-4 of ERF/AP2 transcription factor family.
rchiobhmchr2g0118251	NA	1.313	1.606	(at5g64750 : 125.0) Encodes a putative transcription factor containing an AP2 domain. Is a member of the ERF (ethylene response factor) subfamily B-4 of ERF/AP2 transcription factor family.
rchiobhmchr2g0126301	NA	3.031	NA	(at2g20880 : 166.0) Integrase-type DNA-binding superfamily protein;
rchiobhmchr2g0163201	NA	1.109	NA	(at1g13260 : 278.0) Encodes an AP2/B3 domain transcription factor which is upregulated in response to low temperature.
rchiobhmchr3g0461691	NA	1.727	NA	(at5g05410 : 88.2) Encodes a transcription factor that specifically binds to DRE/CRT cis elements (responsive to drought and low-temperature stress).
rchiobhmchr4g0415231	NA	NaN	NaN	(at4g13620 : 187.0) encodes a member of the DREB subfamily A-6 of ERF/AP2 transcription factor family.
rchiobhmchr4g0423581	NA	2.48	2.74	(at3g16770 : 120.0) Encodes a member of the ERF (ethylene response factor) subfamily B-2 of the plant specific ERF/AP2 transcription factor family (RAP2.3).
rchiobhmchr4g0428891	NA	1.687	1.856	(at5g13330 : 127.0) encodes a member of the ERF (ethylene response factor) subfamily B-4 of ERF/AP2 transcription factor family.
rchiobhmchr4g0435771	NA	1.217	1.761	(at1g25560 : 415.0) Encodes a member of the RAV transcription factor family that contains AP2 and B3 binding domains.
rchiobhmchr5g0001771	NA	0.76	1.338	(at4g22270 : 129.0) Encodes a plasma membrane protein involved in the positive regulation of organ size development.
rchiobhmchr6g0274591	0.431	0.955	1.252	(at5g50080 : 84.3) encodes a member of the ERF (ethylene response factor) subfamily B-4 of ERF/AP2 transcription factor family.
rchiobhmchr6g0295481	NA	2.702	3.624	(at1g21910 : 135.0) encodes a member of the DREB subfamily A-5 of ERF/AP2 transcription factor family.
rchiobhmchr6g0298011	NA	-3.087	-4.219	(at5g11190 : 133.0) encodes a member of the ERF (ethylene response factor) subfamily B-6 of ERF/AP2 transcription factor family.
rchiobhmchr6g0301981	NA	4.425	5.14	(at1g75490 : 164.0) encodes a member of the DREB subfamily A-2 of ERF/AP2 transcription factor family.
rchiobhmchr7g0188681	1.805	NA	2.493	(at5g13330 : 112.0) encodes a member of the ERF (ethylene response factor) subfamily B-4 of ERF/AP2 transcription factor family.
rchiobhmchr7g0188691	1.783	NA	1.662	(at5g13330 : 90.9) encodes a member of the ERF (ethylene response factor) subfamily B-4 of ERF/AP2 transcription factor family.
rchiobhmchr7g0195031	NA	0.938	1.945	(at1g64380 : 106.0) encodes a member of the DREB subfamily A-6 of ERF/AP2 transcription factor family.
rchiobhmchr7g0239701	NA	0.384	1.156	(at1g78080 : 215.0) Encodes a member of the DREB subfamily A-6 of ERF/AP2 transcription factor family (RAP2.4).
ARF
rchiobhmchr2g0095551	NA	-0.84	-1.217	(at5g20730 : 241.0) Encodes an auxin-regulated transcriptional activator. Activates expression of IAA1 and IAA9 in the presence of auxin.
rchiobhmchr5g0058761	NA	-1.51	-2.1	(at2g28350 : 473.0) Involved in root cap cell differentiation, auxin response factor 10 (ARF10);
rchiobhmchr5g0060011	NA	-0.797	-1.237	(at5g60450 : 96.7) Encodes a member of the ARF family of transcription factors which mediate auxin responses.
rchiobhmchr6g0302551	NA	2.472	3.104	(at1g19850 : 165.0) Encodes a transcription factor (IAA24) mediating embryo axis formation and vascular development.
NAC
novel00387	NA	-1.447	-1.333	(at3g15170 : 92.8) Encodes a transcription factor involved in shoot apical meristem formation and auxin-mediated lateral root formation.
rchiobhmchr2g0152301	2.043	NA	1.866	(at2g43000 : 144.0) NAC domain containing protein 42 (NAC042);
HSF
rchiobhmchr2g0093671	NA	-2.69	-4.204	(at2g26150 : 124.0) member of Heat Stress Transcription Factor (Hsf2) family.
rchiobhmchr2g0131371	NA	0.566	1.347	(at5g45710 : 169.0) member of Heat Stress Transcription Factor (Hsf) family; ROOT HANDEDNESS 1 (RHA1);
rchiobhmchr5g0008251	NA	NA	1.735	(at4g36990 : 89.0) encodes a protein whose sequence is similar to heat shock factors that regulate the expression of heat shock proteins.
rchiobhmchr6g0311151	NA	NA	-1.496	(at2g26150 : 202.0) member of Heat Stress Transcription Factor (Hsf2) family.
bZIP
rchiobhmchr2g0100571	NA	1.207	1.041	(at1g75390 : 125.0) basic leucine-zipper 44 (bZIP44)
rchiobhmchr2g0108691	NA	NA	-1.041	(at4g37730 : 96.7) basic leucine-zipper 7 (bZIP7)
rchiobhmchr2g0128811	NA	-3.311	-4.102	(at2g42380 : 140.0) Encodes a member of the BZIP family of transcription factors. Forms heterodimers with the related protein AtbZIP61.
rchiobhmchr2g0164231	NA	NA	5.501	(at3g30530 : 164.0) basic leucine-zipper 42 (bZIP42);
rchiobhmchr4g0436411	NA	0.932	1.854	(at1g68710 : 676.0) ATPase E1-E2 type family protein / haloacid dehalogenase-like hydrolase family protein;
rchiobhmchr6g0265831	NA	0.93	1.11	(at1g75390 : 160.0) basic leucine-zipper 44 (bZIP44);
rchiobhmchr6g0309961	NA	5.488	4.293	(at1g59530 : 91.3) basic leucine-zipper 4 (bZIP4);
HB
rchiobhmchr1g0360751	NA	1.389	2.603	(at3g61890 : 88.2) Encodes a homeodomain leucine zipper class I (HD-Zip I) protein.
rchiobhmchr2g0109191	NA	0.414	1.135	(at2g22800 : 89.7) Encodes homeobox protein HAT9.
rchiobhmchr2g0122751	-4.808	NaN	-4.684	(at2g17950 : 86.7) Homeobox gene controlling the stem cell pool.
rchiobhmchr2g0130101	NA	-5.559	NaN	(at2g17950 : 95.1) Homeobox gene controlling the stem cell pool.
rchiobhmchr2g0158491	NA	-4.598	NA	(at2g17950 : 88.6) Homeobox gene controlling the stem cell pool.
rchiobhmchr4g0433571	NA	NA	2.525	(at1g23380 : 90.5) homeodomain transcription factor KNAT6,
rchiobhmchr4g0440141	-0.568	NA	-1.117	(at1g69780 : 115.0) Encodes a homeodomain leucine zipper class I (HD-Zip I) protein.
rchiobhmchr4g0441321	NA	1.179	1.278	(at2g01430 : 103.0) homeobox-leucine zipper protein 17 (HB17)
rchiobhmchr5g0015931	NA	-2	-2.124	(at2g34710 : 117.0) Dominant PHB mutations cause transformation of abaxial leaf fates into adaxial leaf fates.
rchiobhmchr5g0032341	NA	4.698	5.502	(at5g53980 : 125.0) Encodes a homeodomain leucine zipper class I (HD-Zip I) protein.
rchiobhmchr5g0058801	NA	-0.888	-1.081	(at5g60690 : 127.0) REVOLUTA regulates meristem initiation at lateral positions. a member of a small homeodomain-leucine zipper family.
rchiobhmchr7g0211691	NA	NA	1.022	(at5g46880 : 126.0) homeobox-7 (HB-7);
WRKY
rchiobhmchr2g0106361	0.92	1.104	1.895	(at2g23320 : 85.1) Encodes WRKY DNA-binding protein 15 (WRKY15)
rchiobhmchr2g0133001	NA	1.479	2.4	(at1g80840 : 108.0) Pathogen-induced transcription factor.
rchiobhmchr2g0151681	NA	1.878	3.148	(at4g18170 : 90.9) member of WRKY Transcription Factor
rchiobhmchr2g0158801	NA	1.052	1.444	(at1g62300 : 142.0) Encodes a transcription factor WRKY6.
rchiobhmchr3g0461481	NA	0.749	1.865	(at2g38470 : 108.0) Member of the plant WRKY transcription factor family.
rchiobhmchr4g0398741	0.837	0.447	1.58	(at4g31550 : 121.0) member of WRKY Transcription Factor;
rchiobhmchr4g0425801	1.332	NA	1.589	(at5g49520 : 124.0) Encodes WRKY48,
rchiobhmchr4g0429851	NA	1.298	2.266	(at5g13080 : 82.4) WRKY75 is one of several transcription factors induced during Pi deprivation.
rchiobhmchr5g0002561	1.028	NA	2.579	(at4g22070 : 123.0) member of WRKY Transcription Factor WRKY31;
rchiobhmchr5g0013131	NA	1.719	3.458	(at1g29860 : 101.0) member of WRKY Transcription Factor WRKY71
rchiobhmchr5g0040801	NA	NA	2.25	(at4g04450 : 108.0) member of WRKY Transcription Factor; Group II-b; WRKY42;
rchiobhmchr5g0071811	1.102	1.614	2.676	(at2g38470 : 114.0) Member of the plant WRKY transcription factor family WRKY33
rchiobhmchr6g0305101	NA	0.768	1.607	(at2g24570 : 160.0) member of WRKY Transcription Factor WRKY17;
rchiobhmchr7g0180741	NA	NA	1.878	(at1g18860 : 82.0) member of WRKY Transcription Factor; Group II-b; WRKY DNA-binding protein 61 (WRKY61);
rchiobhmchr7g0196571	NA	NA	3.021	(at4g23550 : 124.0) Encodes WRKY DNA-binding protein 29 (WRKY29).
MYB
rchiobhmchr1g0354061	NA	1.068	1.322	(at3g61250 : 156.0) Member of the R2R3 factor gene family (MYB17).
rchiobhmchr1g0360311	NA	-1.278	-1.572	(at4g09460 : 154.0) Encodes myb6 DNA-binding protein (MYB6)
rchiobhmchr2g0101281	NA	NaN	NaN	(at2g18328 : 108.0) RAD-like 4 (RL4); FUNCTIONS
rchiobhmchr2g0106671	NA	1.055	1.259	(at2g23290 : 235.0) Member of the R2R3 factor gene family (MYB70);
rchiobhmchr4g0392981	NA	NA	2.834	(at2g31180 : 85.9) Member of the R2R3 factor gene family.
rchiobhmchr4g0424331	NA	-3.955	-4.701	(at5g49330 : 80.1) Member of the R2R3 factor gene family.
rchiobhmchr4g0426181	NA	1.699	1.894	(at3g06490 : 149.0) putative transcription factor MYB108 (MYB108) mRNA,
rchiobhmchr4g0434891	NA	2.361	3.012	(at1g68320 : 107.0) putative transcription factor: R2R3-MYB transcription family (MYB62).
rchiobhmchr6g0252211	NA	-1.046	-1.62	(at2g16720 : 134.0) Encodes a member of MYB3R- and R2R3- type MYB- encoding genes; myb domain protein 7 (MYB7)
rchiobhmchr6g0301221	NA	1.538	1.806	(at1g75250 : 117.0) RAD-like 6 (RL6);
rchiobhmchr6g0307001	NA	1.19	NA	(at4g37260 : 182.0) Member of the R2R3 factor gene family.
rchiobhmchr7g0181361	NA	-0.884	-1.16	(at5g62470 : 151.0) Encodes a R2R3 type Myb transcription factor (MYB96) whose expression is strongly induced by abscisic acid.
rchiobhmchr7g0185561	NA	2.296	3.196	(at2g47190 : 105.0) Encodes a MYB transcription factor (MYB2) that possesses an R2R3 MYB DNA binding domain and is known to regulate the expression of salt- and dehydration-responsive genes.
rchiobhmchr7g0202031	NA	-2.907	-4.221	(TAIR:AT4G12350.1) myb domain protein 85 (MYB85);
MYB-relate
rchiobhmchr1g0369341	NA	-0.869	-1.227	(at2g38090 : 144.0) Duplicated homeodomain-like superfamily protein;
rchiobhmchr2g0101281	NA	NaN	NaN	(at2g18328 : 108.0) RAD-like 4 (RL4);
rchiobhmchr6g0301221	NA	1.538	1.806	(at1g75250 : 117.0) RAD-like 6 (RL6);
C2C2-Co-like
rchiobhmchr2g0150861	NA	-2.188	-2.677	(at1g78600 : 93.2) light-regulated zinc finger protein 1 (LZF1);
rchiobhmchr2g0160161	NA	1.943	1.576	(at4g15248 : 83.6) B-box type zinc finger family protein;
rchiobhmchr4g0395281	NA	3.635	4.045	(at1g04500 : 140.0) CCT motif family protein;
rchiobhmchr4g0434191	NA	-1.006	-1.694	(at1g68190 : 135.0) B-box zinc finger family protein;
rchiobhmchr4g0434201	NA	-1.758	-2.678	(at1g68190 : 146.0) B-box zinc finger family protein;
rchiobhmchr4g0435191	NA	-1.291	-1.084	(at1g25440 : 203.0) B-box type zinc finger protein with CCT domain;
rchiobhmchr6g0267001	NA	NA	1.075	(at4g39070 : 100.0) B-box zinc finger family protein;
rchiobhmchr7g0185411	NA	-1.571	-1.26	(at1g25440 : 194.0) B-box type zinc finger protein with CCT domain;
C2C2-Dof
rchiobhmchr2g0104031	NA	-1.155	-1.643	(at1g07640 : 129.0) A member of the DOF transcription factors.
rchiobhmchr2g0110671	NA	-1.247	-2.356	(at5g65590 : 186.0) Dof-type zinc finger DNA-binding family protein;
rchiobhmchr4g0439611	NA	0.682	1.576	(at5g39660 : 317.0) Dof-type zinc finger domain-containing protein,
rchiobhmchr5g0010791	NA	-1.947	-2.396	(at1g29160 : 190.0) Dof-type zinc finger DNA-binding family protein;
rchiobhmchr5g0061151	NA	1.504	1.627	(at2g28510 : 130.0) Dof-type zinc finger DNA-binding family protein;
rchiobhmchr6g0276721	NA	-1.599	-2.292	(at1g21340 : 146.0) Dof-type zinc finger DNA-binding family protein;
rchiobhmchr7g0181561	NA	0.515	1.04	(at3g47500 : 300.0) Dof-type zinc finger domain-containing protein,
rchiobhmchr7g0183751	NA	-1.28	-1.072	(at5g60850 : 129.0) Encodes a zinc finger protein.
C2C2-gata
rchiobhmchr1g0348681	NA	-2.587	-3.999	(at3g60530 : 166.0) Encodes a member of the GATA factor family of zinc finger transcription factors.
rchiobhmchr2g0140091	NA	-1.239	-1.709	(at5g25830 : 206.0) Encodes a member of the GATA factor family of zinc finger transcription factors.
C2H2
novel02317	NA	0.625	1.241	(at2g27580 : 161.0) A20/AN1-like zinc finger family protein;
rchiobhmchr1g0333131	NA	NA	1.732	(at3g18290 : 279.0) Encodes BRUTUS (BTS), a putative E3 ligase protein with metal ion binding and DNA binding domains,
rchiobhmchr1g0366121	NA	2.156	3.402	at2g28710 : 121.0) C2H2-type zinc finger family protein;
rchiobhmchr3g0479101	NA	-2.59	-3.722	(at2g41940 : 136.0) Encodes a zinc finger protein containing only a single zinc finger.
rchiobhmchr3g0481001	NA	NA	-1.05	(at3g57670 : 127.0) NO TRANSMITTING TRACT (NTT);
rchiobhmchr4g0434821	NA	1.858	2.009	(at1g68360 : 136.0) C2H2 and C2HC zinc fingers superfamily protein;
rchiobhmchr4g0435741	NA	-1.757	-2.288	(at1g13290 : 257.0) Encodes a putative zinc finger protein (C2H2 family, type IIIA, subclass A1d) that has a WIP domain.
rchiobhmchr5g0029121	NA	-2.105	-2.082	(at3g14740 : 259.0) RING/FYVE/PHD zinc finger superfamily protein;
rchiobhmchr5g0050641	NA	1.164	0.912	(at5g12330 : 103.0) A member of SHI gene family.
rchiobhmchr5g0056621	NA	NA	3.38	(at5g22890 : 307.0) C2H2 and C2HC zinc fingers superfamily protein;
rchiobhmchr5g0062941	NA	NA	1.952	(at2g28710 : 121.0) C2H2-type zinc finger family protein;
rchiobhmchr5g0062951	NA	NA	2.375	(at2g28710 : 127.0) C2H2-type zinc finger family protein;
rchiobhmchr6g0253491	NA	1.69	1.818	(at1g27730 : 148.0) Related to Cys2/His2-type zinc-finger proteins found in higher plants.
rchiobhmchr6g0254511	NA	-1.554	-1.489	(at1g24625 : 83.2) Encodes a zinc finger protein containing only a single zinc finger.
rchiobhmchr6g0309391	NA	1.02	1.328	(at1g27730 : 158.0) Related to Cys2/His2-type zinc-finger proteins found in higher plants.
rchiobhmchr7g0177741	NA	-0.732	-1.197	(at2g01940 : 104.0) May be involved in an early event in shoot gravitropism such as gravity perception and/or a signaling process subsequent to amyloplast sedimentation as a putative transcription factor in gravity-perceptive cells.
rchiobhmchr7g0228771	NA	NA	-1.01	(at1g72050 : 95.9) Encodes a transcriptional factor TFIIIA required for transcription of 5S rRNA gene.
C3H
rchiobhmchr1g0370401	NA	0.729	1.469	(at2g40140 : 590.0) CZF1;
rchiobhmchr2g0092381	NA	2.138	1.882	(at2g19810 : 395.0) CCCH-type zinc finger family protein; C
rchiobhmchr5g0069901	NA	0.539	1.014	(at5g58620 : 585.0) zinc finger (CCCH-type) family protein;
